# Supplementary material
Source: publisher figshare collection journal article supplement (https://gsajournals.figshare.com/ndownloader/files/27742026)
Supplement: Supplementary file 1 [file 27742026]

Table S2: List of repetitive elements in the genome of *Metarhizium humberi* ESALQ1638

|  | | | **ESALQ1638** | | |
| --- | --- | --- | --- | --- | --- |
| Number of  elements | bp  included | Percentage in  genome |
| Retroelements | SINEs | | 0 | 0 | 0.00 |
| Penelope | | 2 | 175 | 0.00 |
| LINEs | CRE/SLACS | 1 | 66 | 0.00 |
| TOTAL | 36 | 11505 | 0.03 |
| LTR elements | BEL/Pao | 0 | 0 | 0.00 |
| Ty1/Copia | 55 | 10704 | 0.03 |
| Gypsy/DIRS1 | 123 | 34549 | 0.09 |
| TOTAL | 181 | 45460 | 0.12 |
| TOTAL | | 217 | 56965 | 0.15 |
| DNA Transposons | hobo-Activator | | 7 | 2293 | 0.01 |
| Tc1-IS630-Pogo | | 24 | 3277 | 0.01 |
| En-Spm | | 0 | 0 | 0.00 |
| MuDR-IS905 | | 0 | 0 | 0.00 |
| PiggyBac | | 3 | 885 | 0.00 |
| Tourist/Harbinger | | 6 | 479 | 0.00 |
| Other (Mirage, P-element, Transib) | | 1 | 59 | 0.00 |
| TOTAL | | 62 | 9299 | 0.02 |
| Rolling-circles | | | 0 | 0 | 0.00 |
| Unclassified | | | 4 | 519 | 0.00 |
| Total interspersed repeats | | |  | 66783 | 0.17 |
| Small RNA | | | 10 | 5763 | 0.01 |
| Satellites | | | 33 | 3770 | 0.01 |
| Simple repeats | | | 7390 | 300402 | 0.78 |
| Low complexity | | | 886 | 42515 | 0.11 |
| **TOTAL** | | | **8602** | **419233** | **1.08** |
